# Supplementary material for: PKI-587 enhances radiosensitization of hepatocellular carcinoma by inhibiting the PI3K/AKT/mTOR pathways and DNA damage repair
Source: PubMed Central journal article supplement (PMC8525768; doi:10.1371/journal.pone.0258817), 2021-10-19

**Fig 1A**

The blots are grouped from left to right: Control (0Gy IR + 0 $\mu$ M PKI-587), 2Gy IR + 0 $\mu$ M PKI-587, 0Gy IR + 0.1 $\mu$ M PKI-587, 2Gy IR + 0.1 $\mu$ M PKI-587.

PI3Kp110 $\alpha$  110KDa

PI3Kp110r 110KDa

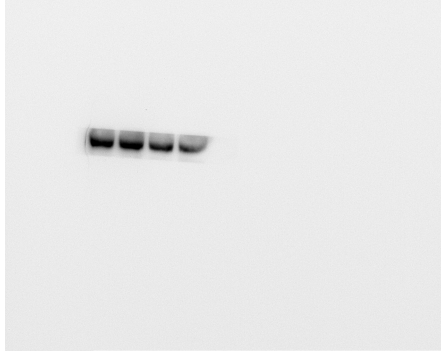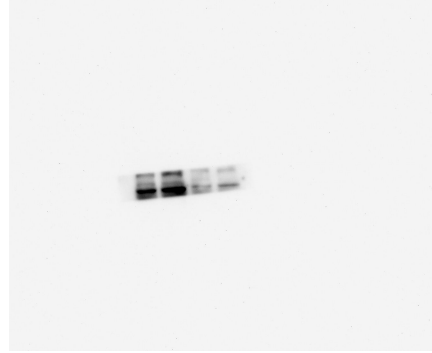

p-Akt(Ser473) 60KDa

Akt 60KDa

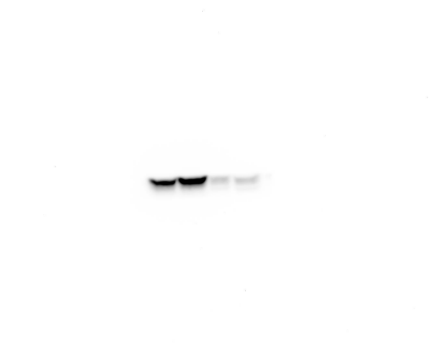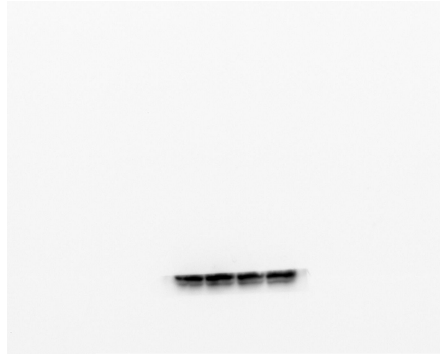

p-mTOR(Ser2448) 289KDa

mTOR 289KDa

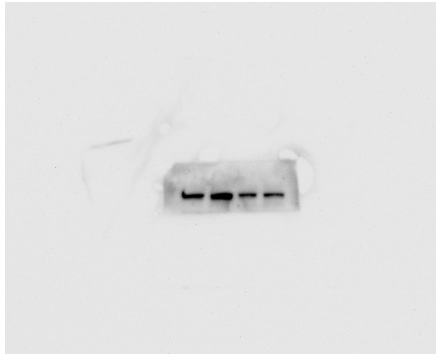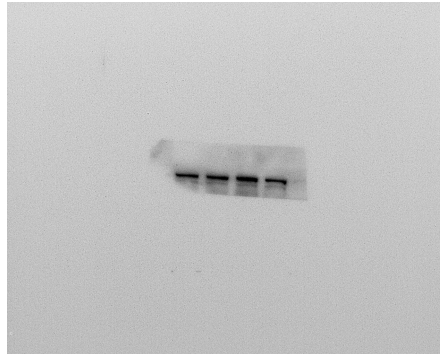

$\beta$ -actin 45KDa

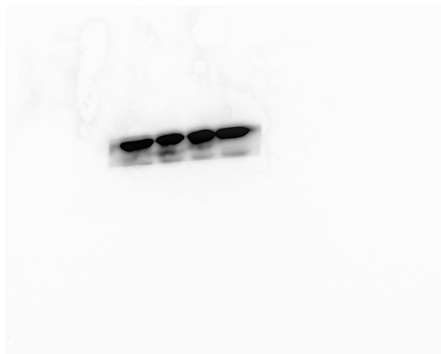

**Fig 1C**

The blots are grouped from left to right: Control (0Gy IR + 0 $\mu$ M PKI-587), 2Gy IR + 0 $\mu$ M PKI-587, 0Gy IR + 0.1 $\mu$ M PKI-587, 2Gy IR + 0.1 $\mu$ M PKI-587.

p-DNAPKcs(Ser2056) 469KDa

DNAPKcs 460-469KDa

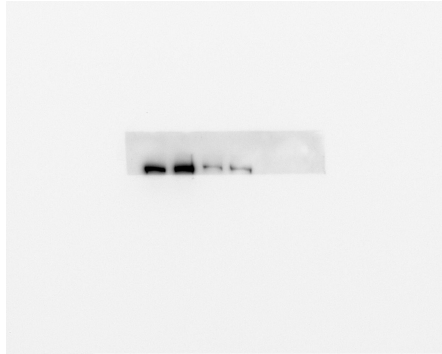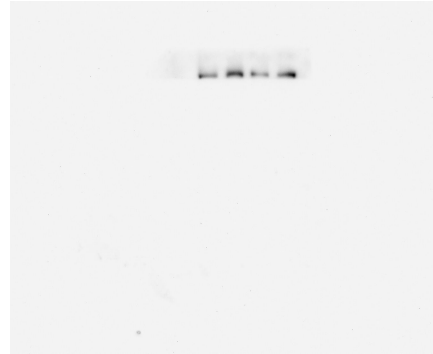

p-ATM(Ser1981) 100KDa

ATM 350KDa

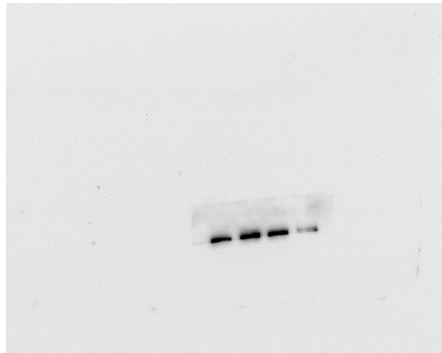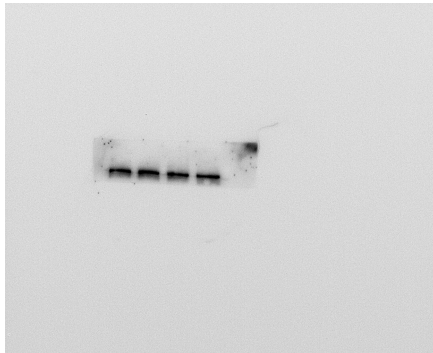

p-ATR(Ser428) 300KDa

ATR 300-309KDa

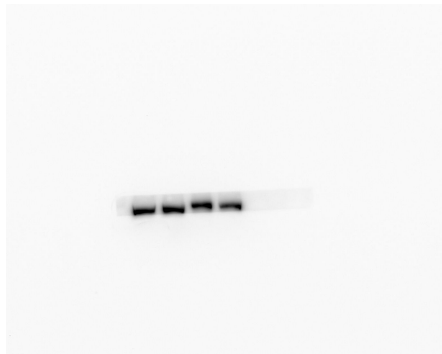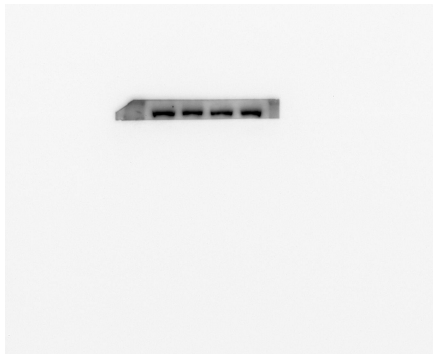

$\beta$ -actin 45KDa

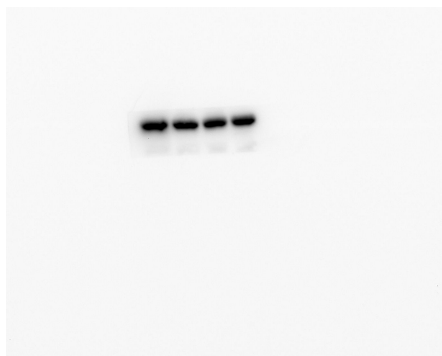

## Fig 2D

The blots are grouped from left to right: Control (0Gy IR + 0 $\mu$ M PKI-587), 2Gy IR + 0 $\mu$ M PKI-587, 0Gy IR + 0.1 $\mu$ M PKI-587, 2Gy IR + 0.1 $\mu$ M PKI-587.

p-S6K1 70KDa

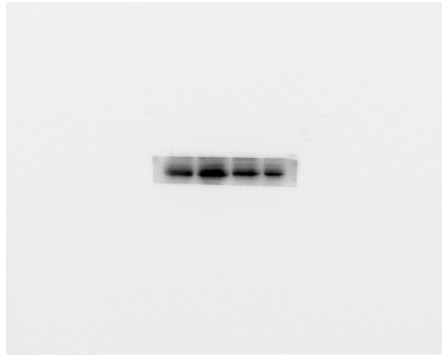

p70S6K KDa

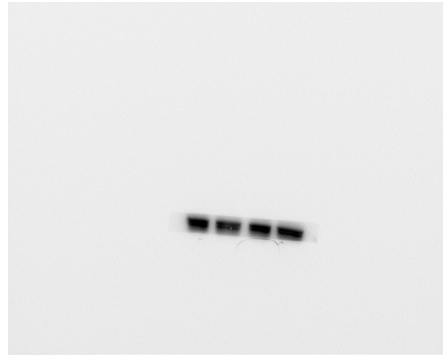

$\beta$ -actin 45KDa

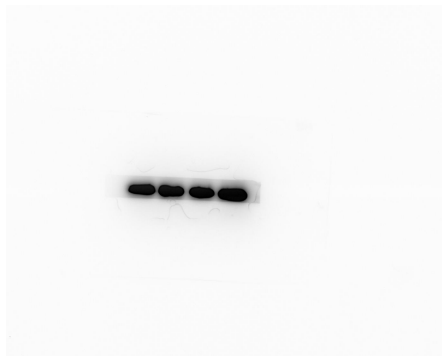

### Fig 3C

The blots are grouped from left to right: 0h, 12h, 24h, 48h.

r-H2AX (2 Gy IR) 15-20KDa

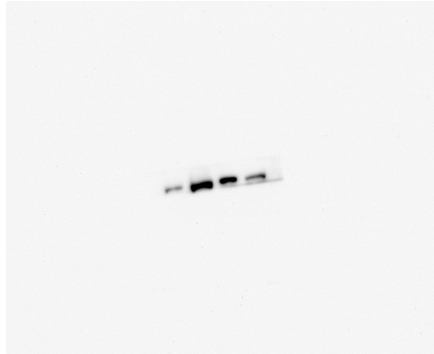

$\beta$ -actin 45KDa

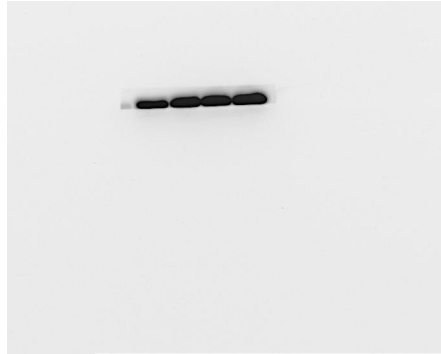

r-H2AX (2Gy IR + 0.1 $\mu$ M PKI-587) 15-20KDa  $\beta$ -actin 45KDa

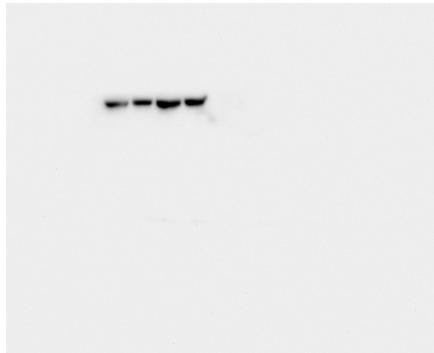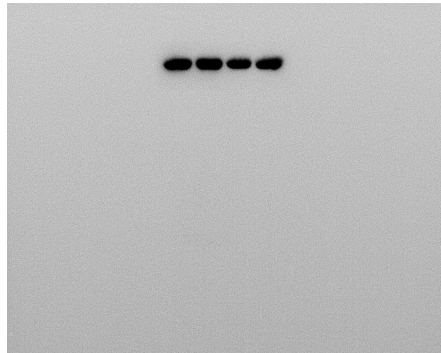

**Fig 4C**

The blots are grouped from left to right: Control (0Gy IR + 0 $\mu$ M PKI-587), 2Gy IR + 0 $\mu$ M PKI-587, 0Gy IR + 0.1 $\mu$ M PKI-587, 2Gy IR + 0.1 $\mu$ M PKI-587.

p-Rb 106KDa

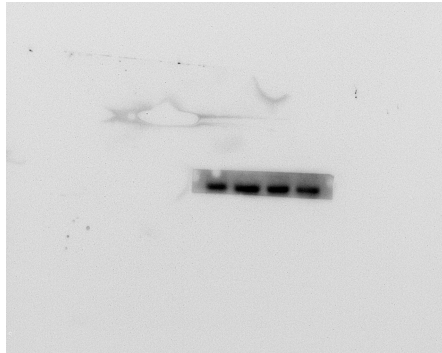

Rb 105KDa

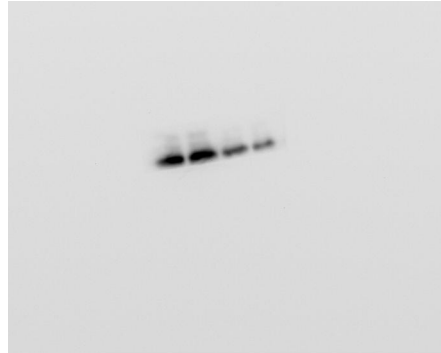

CyclinD1 33KDa

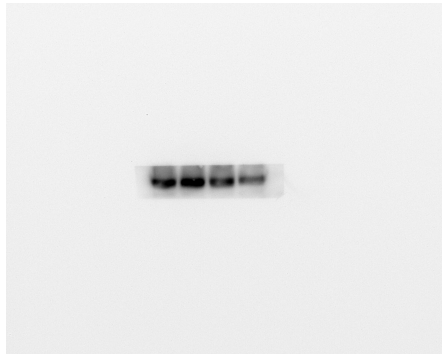

$\beta$ -actin 45KDa

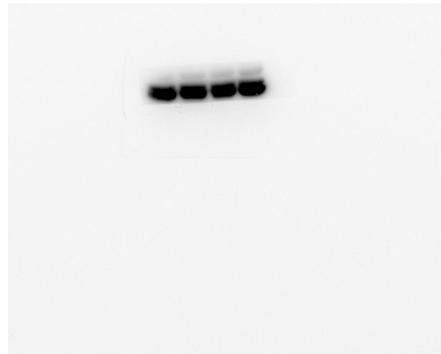

**Fig 5G**

The blots are grouped from left to right: Control (0Gy IR + 0 $\mu$ M PKI-587), 2Gy IR + 0 $\mu$ M PKI-587, 0Gy IR + 0.1 $\mu$ M PKI-587, 2Gy IR + 0.1 $\mu$ M PKI-587.

p-Bad 23KDa

Bad 25KDa

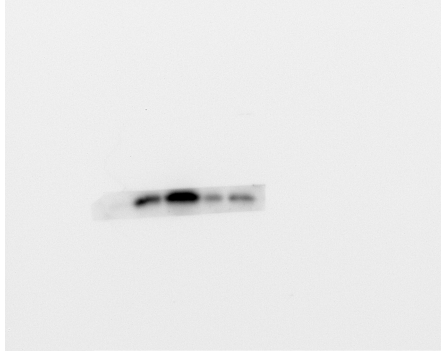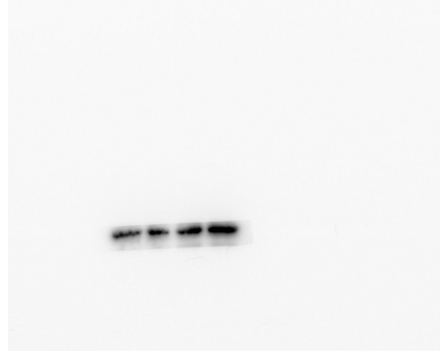

c-Caspase9 42KDa

Caspase9 42KDa

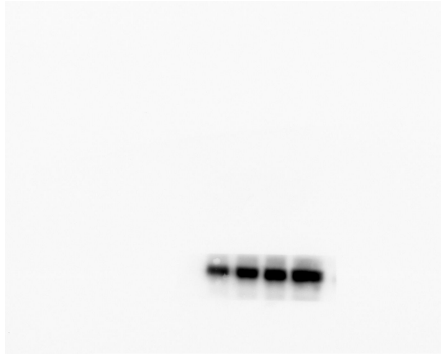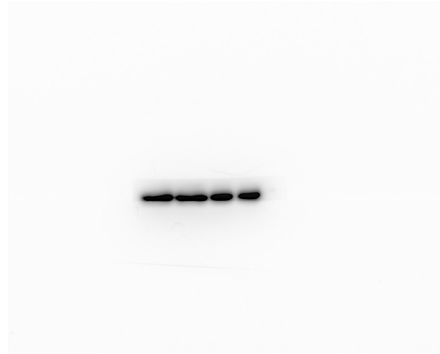

c-Caspase3 35KDa

Caspase3 37KDa

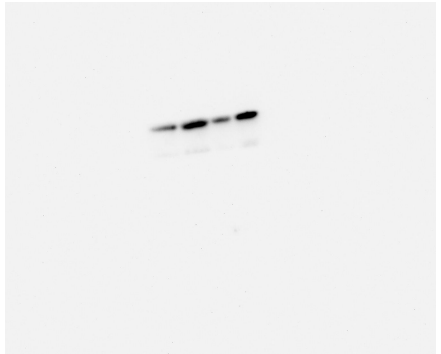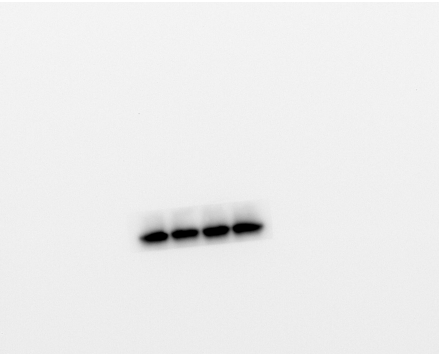

c-PARP 89KDa

PARP 116KDa

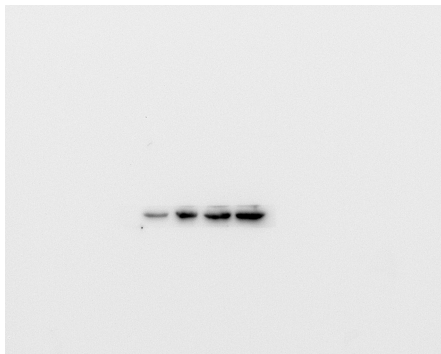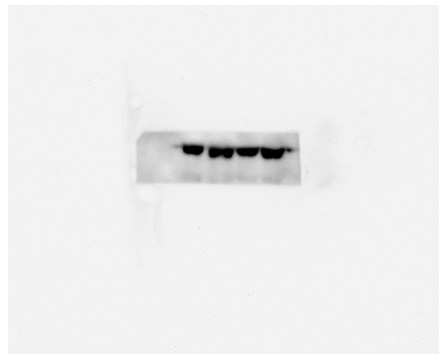

$\beta$ -actin 45KDa

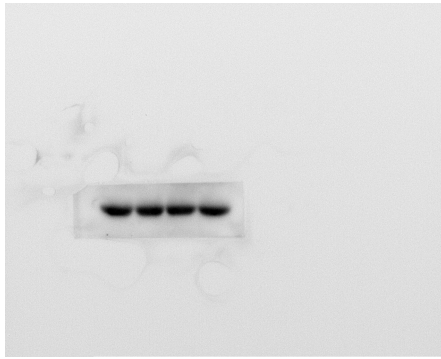

### S1 Fig

The blots are grouped from left to right: Control (0Gy IR + 0 $\mu$ M PKI-587), 2Gy IR + 0 $\mu$ M PKI-587, 0Gy IR + 0.1 $\mu$ M PKI-587, 2Gy IR + 0.1 $\mu$ M PKI-587.

p-eIF4EBP1 12KDa

eIF4EBP1 18KDa

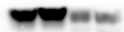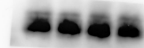

$\beta$ -actin 45KDa

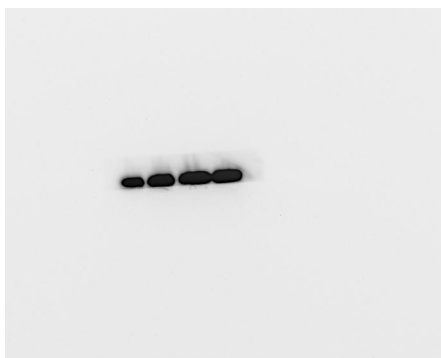

## S2A Fig

The blots are grouped from left to right: Control (0Gy IR + 0mg/kg PKI-587), 2Gy IR + 0mg/kg PKI-587, 0Gy IR + 25mg/kg PKI-587, 2Gy IR + 25mg/kgPKI-587.

PI3Kp110 $\alpha$  110KDa

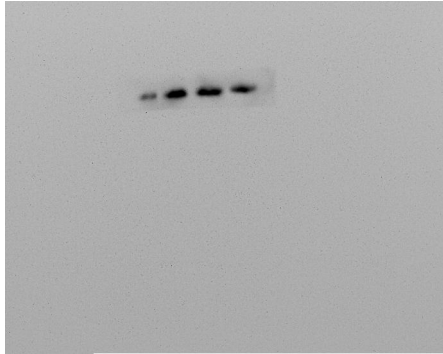

p-Akt(Ser473) 60KDa

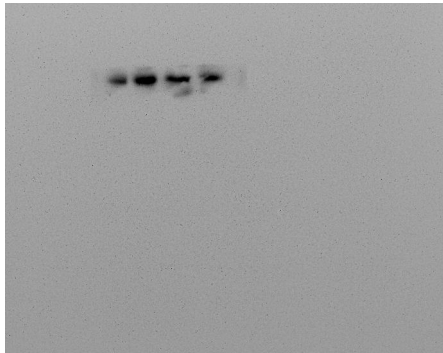

Akt 60KDa

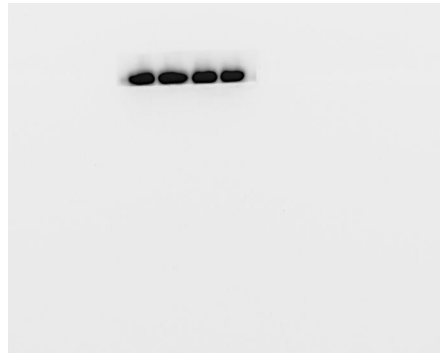

p-mTOR(Ser2448) 289KDa

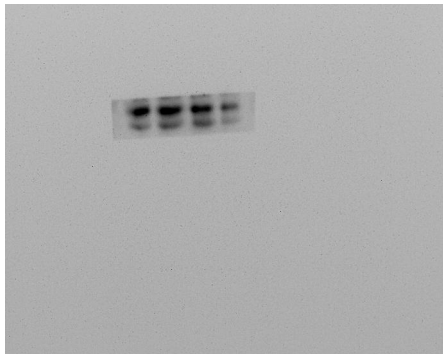

mTOR 289KDa

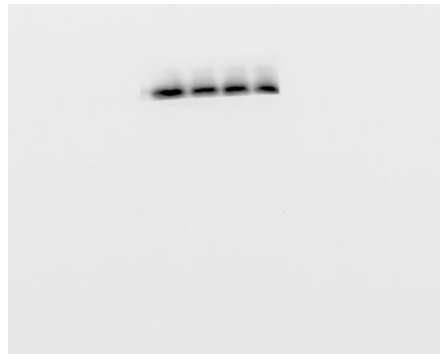

$\beta$ -actin 45KDa

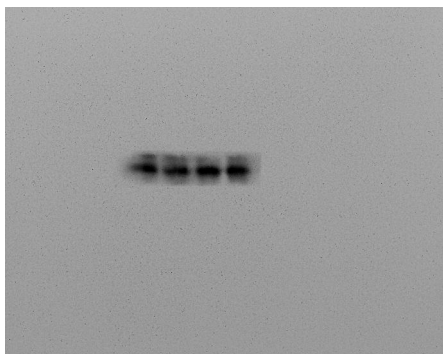



## S2B Fig

The blots are grouped from left to right: Control (0Gy IR + 0mg/kg PKI-587), 2Gy IR + 0mg/kg PKI-587, 0Gy IR + 25mg/kg PKI-587, 2Gy IR + 25mg/kgPKI-587.

p-DNAPKcs(Ser2056) 469KDa

DNAPKcs 460-469KDa

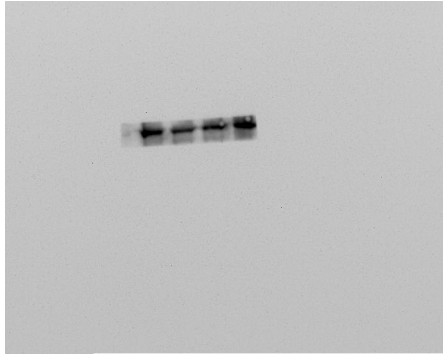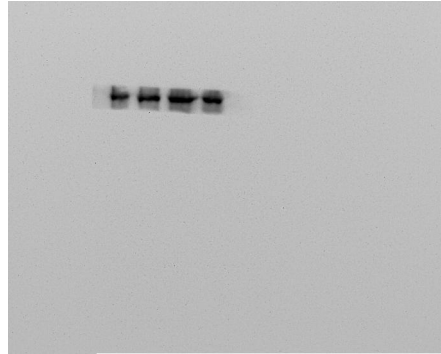

p-ATM(Ser1981) 100KDa

ATM 350KDa

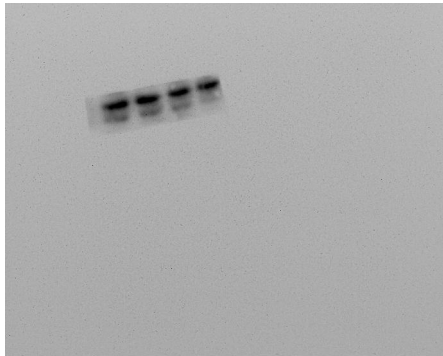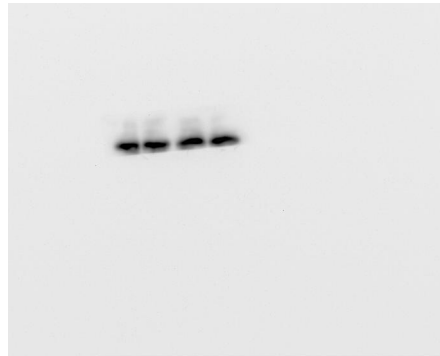

p-ATR(Ser428) 300KDa

ATR 300-309KDa

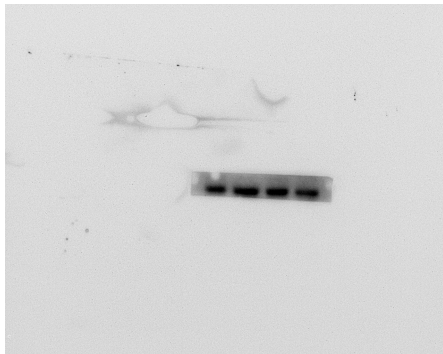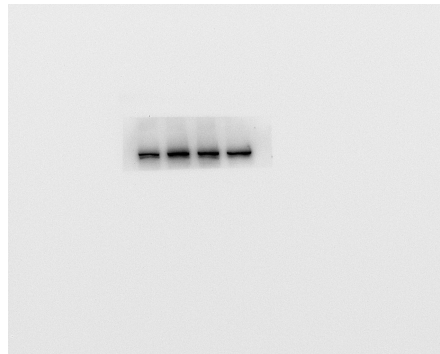

$\beta$ -actin 45KDa

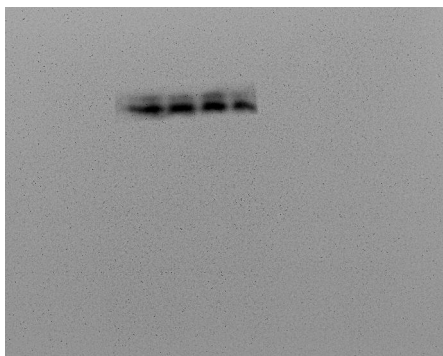

Supplement: pone.0258817.s004.pdf [file pone.0258817.s004.pdf]
